# Supplementary material for: Accelerated Corneal Endothelial Cell Loss after Phacoemulsification in Patients with Mildly Low Endothelial Cell Density
Source: MDPI journal article supplement (doi:10.3390/jcm10112270), 2021-05-24
Supplement: s1 [file s1]

## Supplementary Materials:

**Figure S1.** Histogram of pre- and post-operatively ECD count in this study.

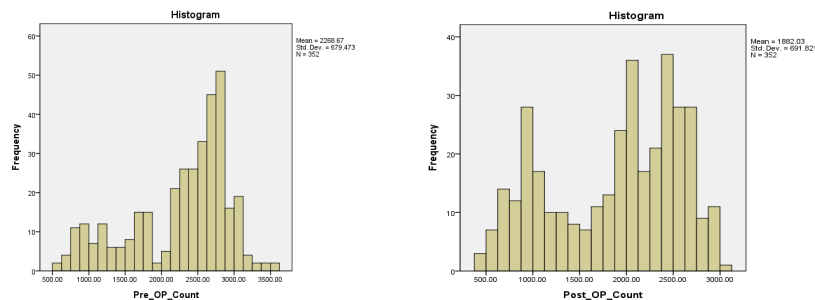

**Table S1.** Normality test of pre- and post-operatively ECD in subgroups.

| Tests of Normality | Group | Kolmogorov-Smirnova |     |        | Shapiro-Wilk |     |       |
|--------------------|-------|---------------------|-----|--------|--------------|-----|-------|
|                    |       | Statistic           | df  | Sig.   | Statistic    | df  | Sig.  |
| Pre_OP_Count       | A     | 0.115               | 29  | 0.200* | 0.936        | 29  | 0.077 |
|                    | B     | 0.119               | 71  | 0.014  | 0.933        | 71  | 0.001 |
|                    | C     | 0.042               | 252 | 0.200* | 0.982        | 252 | 0.003 |
| Post_OP_Count      | A     | 0.107               | 29  | 0.200* | 0.956        | 29  | 0.257 |
|                    | B     | 0.143               | 71  | 0.001  | 0.951        | 71  | 0.008 |
|                    | C     | 0.075               | 252 | 0.002  | 0.974        | 252 | 0.000 |

\* This is a lower bound of the true significance.
